## CORRESPONDENCE

Anesthesiology  
80:477, 1994  
© 1994 American Society of Anesthesiologists, Inc.  
J. B. Lippincott Company, Philadelphia

## Desflurane Is Not an Isomer of Isoflurane

*To the Editor:*—A recent editorial published in the Journal states that desflurane and isoflurane are isomers.<sup>1</sup> The definition of isomerism is "the possession by two or more distinct compounds of the same molecular formula, each molecule possessing an identical number of atoms of each element, but in different arrangement."<sup>2</sup> Among the halogenated inhalation anesthetics in current clinical use, the only isomers are isoflurane and enflurane. Desflurane, unlike isoflurane and enflurane, does not contain chloride. Therefore, it is misleading and incorrect to refer to desflurane as an isomer of isoflurane.

**Rafael A. Ortega, M.D.**  
Assistant Professor in Anesthesiology

**Monica Botero, M.D.**  
Resident in Anesthesiology

**Harold Arkoff, M.D.**  
Fellow in Anesthesiology

Department of Anesthesiology  
Boston University Medical Center  
88 East Newton Street  
Boston, Massachusetts 02130

## References

1. Lowenstein E: Sympathetic nervous system activation and hyperdynamic circulation associated with desflurane: Not all isomers are created equal. *ANESTHESIOLOGY* 79:419–421, 1993
2. Freil JP: *Dorland's Illustrated Medical Dictionary*. Philadelphia, WB Saunders, 1981, p 684

(Accepted for publication October 4, 1993.)

Anesthesiology  
80:477, 1994  
© 1994 American Society of Anesthesiologists, Inc.  
J. B. Lippincott Company, Philadelphia

## Where Are the Isomers?

*To the Editor:*—We read with enthusiasm the editorial, "Sympathetic Nervous System Activation and Hyperdynamic Circulation Associated with Desflurane: Not All Isomers Are Created Equal."<sup>1</sup> After further study of the context, it became clear that the so-called isomers referred to were the two fluorinated inhalational anesthetics, isoflurane and desflurane.

According to the *Van Nostrand Reinhold Encyclopedia of Chemistry*,<sup>2</sup> isomers are defined as compounds that incorporated the same elements in exactly the same numbers. The chemical composition of isoflurane is  $C_3H_2ClF_5O$ ; the composition of desflurane is  $C_3H_2F_6O$ . With different chemical composition, these compounds cannot be called isomers. The substituted moiety or function groups confer to the compounds different physical and chemical properties. Just because of the identical carbon skeleton, calling these compounds isomers and expecting to see similar properties between them is analogous to calling methane and chloroform isomers and expecting them to have similar properties.

Despite the difference in the semantics of the word "isomer," we enjoyed reading this article, marvel at the insight, and agree with the conclusion.

**G. Ronald Heinrich, M.D., F.R.C.P.C.**  
Department of Anesthesiology  
Texas Tech University Health Sciences Center  
Lubbock, Texas 79430

**Y. James Kao, Ph.D., M.D.**  
Department of Anesthesiology  
University of California Irvine Medical Center  
Orange, California 92668

## References

1. Lowenstein E: Sympathetic nervous system activation and hyperdynamic circulation associated with desflurane: Not all isomers are created equal. *ANESTHESIOLOGY* 79:419–421, 1993
2. Considine D, Considine G: Isomerism, *Encyclopedia of Chemistry*. 4th edition. New York, Van Nostrand Reinhold, 1984

(Accepted for publication October 18, 1993.)
